# Supplementary material for: What Is in a Number? Evaluating a Risk Assessment Tool in Immediate Breast Reconstruction
Source: PubMed Central journal article supplement — Plast Reconstr Surg Glob Open. 2019 Dec 31;7(12):e2585. doi: 10.1097/GOX.0000000000002585 (PMC7288883; doi:10.1097/gox.0000000000002585), 2019-12-31
Supplement: gox-7-e2585-s001.pdf [file gox-7-e2585-s001.pdf]

Supplemental Digital Content 1: Worksheets for Intra- and Post-Operative Mastectomy Flap Evaluation

Intra-Operative Checklist for Evaluation of Mastectomy Flap Quality

1. Flap Visibly Mottled (1: Yes, 0: No)
2. Demis Visible on Flap Underside (1: Yes, 0: No)
3. Cap Refill Present (0: Yes, 1: No)
4. Cautery Utilized to Perform Mastectomy (1:Yes, 0: No)
5. Methylene Blue Infiltrated Into Flap (1:Yes, 0: No)
6. Bleeding from Flap Edges (0: Yes, 1: No)
7. “Pinch Test” Estimated Less Than 1 Centimeter (1:Yes, 0: No)
8. 0.5% Lidocaine 1:200,000 Epinephrine Solution Utilized (1:Yes, 0: No)

Total Score: \_\_\_\_\_

(Greater Scores Indicate Higher Likelihood of Mastectomy Flap Compromise)

Breast Measurements

1. Sternal Notch to Nipple (cm) \_\_\_\_\_
2. Nipple to Inframammary Fold (cm) \_\_\_\_\_
3. Breast Width (cm) \_\_\_\_\_
4. Distance from Middle of Incision to Mid-Clavicle (cm) \_\_\_\_\_
5. Distance from Middle of Incision to Inframammary Fold (cm) \_\_\_\_\_

Intra-Operative Diagram of Mastectomy Flap Quality

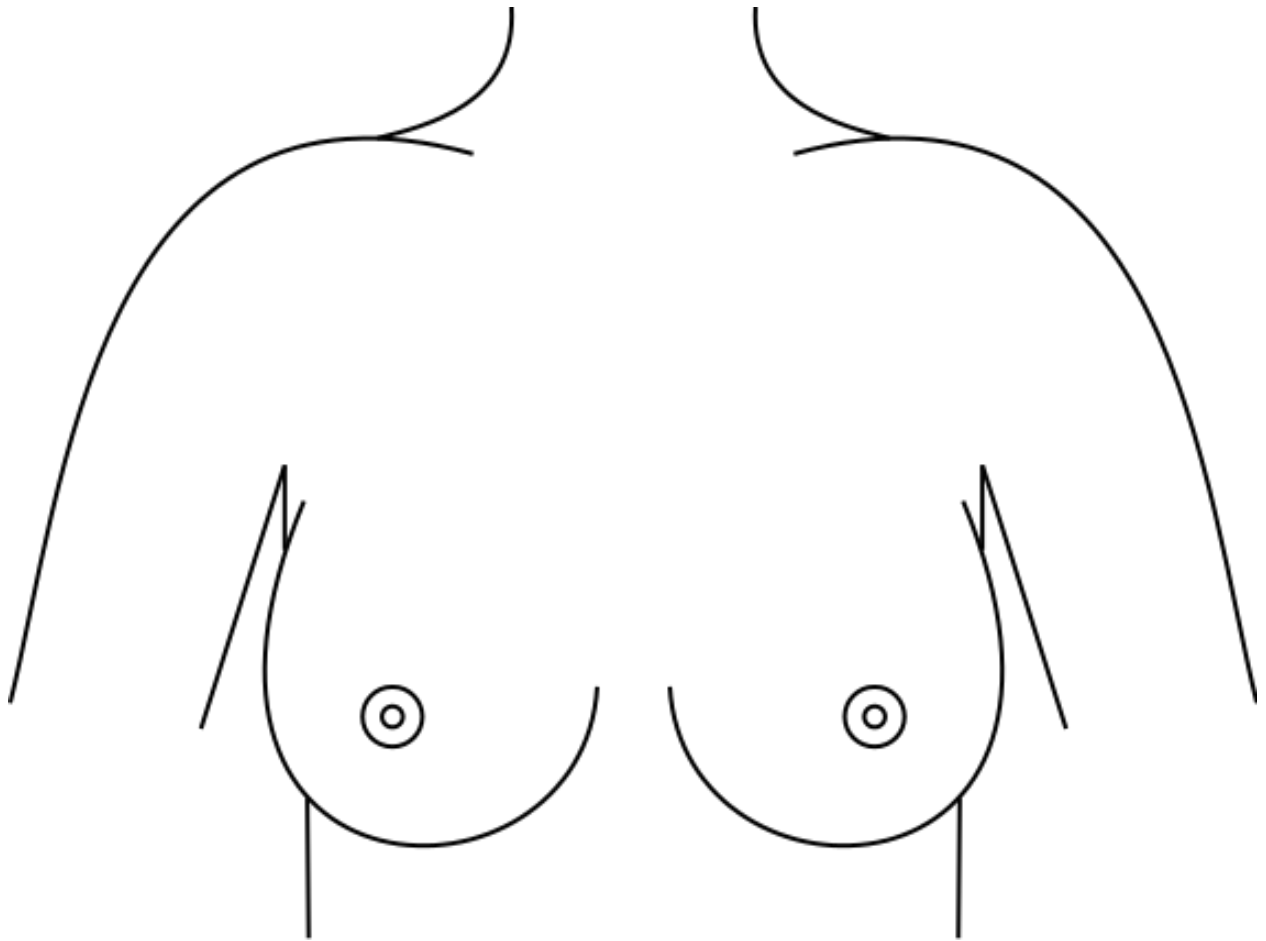

On the above diagram, please

1. Mark mastectomy incision(s) and
2. Shade areas with the mastectomy flap characteristics indicated from above checklist

Post-Operative Diagram of Mastectomy Flap Quality

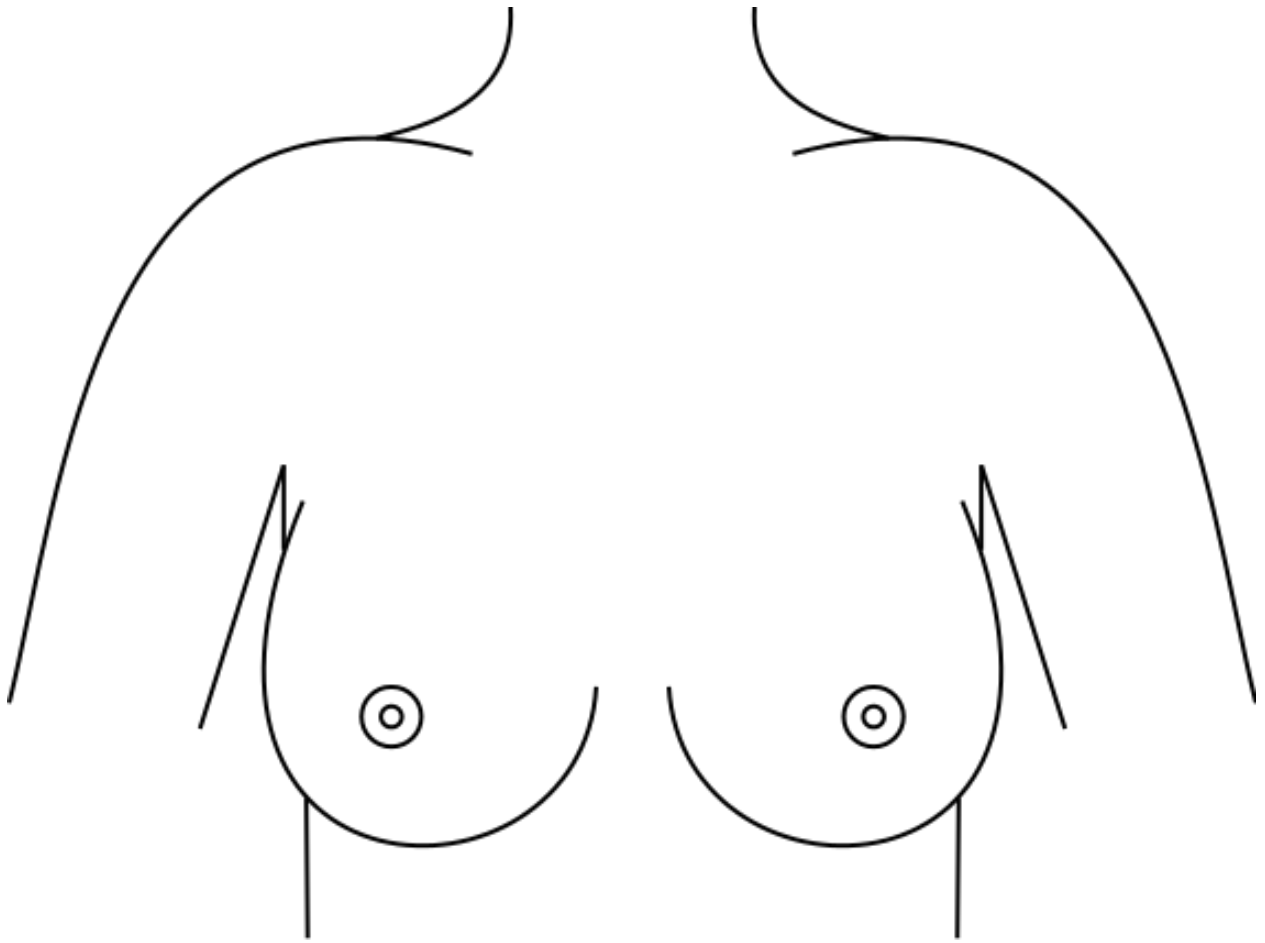

On the above diagram, please

1. Shade areas of mastectomy flap compromise and
2. Indicate severity of each area of mastectomy flap compromise (epidermolysis, partial-thickness mastectomy flap necrosis, full-thickness mastectomy flap necrosis, etc.)
